## Effects of Protein Intake on Pulmonary Gas Exchange and Ventilatory Drive in Postoperative Patients

B. Delafosse, M.D.,\* Y. Bouffard, M.D.,\* O. Bertrand, Ph.D.,† J. P. Viale, M.D.,\* G. Annat, M.D.,‡ J. Motin, M.D.§

The effects of different protein regimens on pulmonary gas exchange and ventilatory drive were examined in eight postoperative patients receiving inspiratory pressure support ventilation. They were studied during 60 consecutive hours, which included two 12-h periods of high protein intake (33% of total caloric intake provided as protein), each of them being preceded and followed by a 12-h period of standard protein intake (14% of total caloric intake provided as protein). Throughout the study, total caloric intake was 1.5 times the predicted resting energy expenditure. Nitrogen was provided as a 24% branched chain amino acid (BCAA) solution during the period of standard protein intake. During the periods of high protein intake, it was provided as a 24% and a 41% BCAA solution. Pulmonary gas exchange was continuously measured during the second half of each period, with the use of a mass spectrometer system. Measurements of the ventilatory response to CO<sub>2</sub> (F<sub>I</sub>CO<sub>2</sub>, 0, 1.5, and 3%) were achieved at the end of each dietary regimen. O<sub>2</sub> consumption, CO<sub>2</sub> production, respiratory quotient, minute ventilation, and PaCO<sub>2</sub> were the same for the three protein regimens. Changing protein intake failed to affect the ventilatory response to CO<sub>2</sub>. The authors conclude that, in postoperative patients having inspiratory pressure support ventilation, the administration of a high protein intake does not affect the ventilatory drive and the pulmonary gas exchange. (Key words: Recovery: ventilation. Ventilation: protein intake.)

A HIGH NITROGEN INTAKE with a total caloric intake close to energy expenditure has been proposed to improve nitrogen balance,<sup>1</sup> while avoiding the complications of hypercaloric total parenteral nutrition.<sup>2-4</sup> In addition, Cerra *et al.*<sup>5</sup> suggested a further improvement in nitrogen balance by the administration of solutions enriched by branched chain amino acids (BCAA).<sup>5</sup>

However, protein intake can modify the ventilatory function in nutritionally depleted patients as well as in healthy subjects.<sup>6,7</sup> Increasing protein intake increases minute ventilation ( $\dot{V}E$ ) and reduces the resting arterial carbon dioxide partial pressure (PaCO<sub>2</sub>), which has been attributed to an enhanced ventilatory drive.<sup>6,7</sup> This effect was observed from the fourth hour after an increase in protein intake<sup>7</sup> and was magnified when a BCAA-enriched solution was used in place of a conventional amino acid

solution.<sup>8</sup> These findings could be clinically relevant in patients with compromised respiratory muscle functions who are unable to properly increase  $\dot{V}E$ <sup>7</sup> or in patients in the postoperative period of thoracoabdominal surgery, which leads to a decreased efficiency of the respiratory muscles.<sup>9</sup>

Therefore, we examined the effect of different protein regimens on pulmonary gas exchange and ventilatory drive in postoperative patients receiving inspiratory pressure support ventilation.

### Materials and Methods

The study was conducted with eight male patients who required 3 days of respiratory and nutritional support after a major surgical procedure. Clinical data are given in table 1. All the patients had normal preoperative pulmonary function tests. None of them had evidence of diabetes, sepsis, hepatic, or renal dysfunction. They were normovolemic and had normal cardiovascular function. This protocol was approved by the ethics committee of our institution, and informed consent was obtained from the patients' nearest relatives.

The patients were tracheally intubated and were undergoing spontaneous ventilation, with a +15 cmH<sub>2</sub>O inspiratory pressure support (Siemens Servo C®).

The general outline of the study is shown in figure 1. Each patient was studied during 60 consecutive hours, which included two 12-h high-protein-intake periods (from 0700 to 1900), each of them being preceded and followed by a 12-h standard protein intake period (from 1900 to 0700). Throughout the study, the total caloric intake was set at 1.5 times the predicted resting energy expenditure, calculated according to the reevaluated Harris Benedict formula<sup>10</sup> applied to each patient's ideal weight.<sup>11</sup> During the high-protein periods, protein represented 33% of total caloric intake with a 1-g nitrogen:50 nonprotein kilocalories ratio. During the standard protein period, protein represented 14% of total caloric intake with a 1-g nitrogen:150 nonprotein kilocalories ratio. Nitrogen was provided as a 24% BCAA standard solution (Totamine®; Cernep Synthelabo) during the standard protein intake periods. During the high-protein-intake periods, nitrogen was provided for each patient in a random order as the 24% or as a 41% BCAA solution (Valinor®; Cernep Synthelabo). The nonprotein calories were given as 50% glucose-50% fat (Intralipid® 20%; Kabi Vitrum). The nutrients were continuously infused with

\* Praticien Hospitalier d'Anesthésie-Réanimation.

† Docteur Ingénieur.

‡ Chef de Travaux de Physiologie.

§ Professeur d'Anesthésie-Réanimation.

Received from the Service de Réanimation, Hospices Civils de Lyon, Hôpital Edouard Herriot, Place d'Arsonval, 69437 Lyon Cedex 03, France. Accepted for publication October 17, 1988. Supported in part by grants from Cernep Synthelabo and from the Faculté de Médecine Grange Blanche-Lyon.

Address reprint requests to Dr. Delafosse.

TABLE 1. Characteristics of Patients

| Patient No. | Age (yr) | Height (cm) | Weight (kg) | PREE (kcal/day) | Diagnosis and Surgical Procedure                          |
|-------------|----------|-------------|-------------|-----------------|-----------------------------------------------------------|
| 1           | 59       | 169         | 62          | 1,395           | Esophagus carcinoma; cervicotomy; thoracotomy; laparotomy |
| 2           | 58       | 176         | 92          | 1,541           | Stomach (cardia) carcinoma; thoracotomy; laparotomy       |
| 3           | 49       | 168         | 89          | 1,467           | Esophagus carcinoma; thoracotomy; laparotomy              |
| 4           | 57       | 164         | 51          | 1,235           | Esophagus carcinoma; thoracotomy; laparotomy              |
| 5           | 53       | 170         | 59          | 1,394           | Esophagus carcinoma; cervicotomy; laparotomy              |
| 6           | 55       | 167         | 60          | 1,381           | Esophagus carcinoma; cervicotomy; laparotomy              |
| 7           | 67       | 175         | 76          | 1,566           | Esophagus carcinoma; thoracophrenolaparotomy              |
| 8           | 64       | 164         | 51          | 1,205           | Esophagus carcinoma; cervicotomy; laparotomy              |
| Mean ± SE   | 58 ± 2   | 169 ± 2     | 67 ± 6      | 1,398 ± 46      |                                                           |

PREE = predicted resting energy expenditure.

an electric pump (IVAC Corporation) through a central venous catheter.

During the second half of each period, oxygen consumption ( $\dot{V}_{O_2}$ ), carbon dioxide production ( $\dot{V}_{CO_2}$ ), respiratory quotient (RQ),  $\dot{V}E$ , and respiratory rate were continuously measured and recorded with a system using a mass spectrometer (mass spectrometer Perkin Elmer® MGA 1100—microcomputer Kontron® PSI 80). A thorough description and validation of the system has been given in a previous report.<sup>12</sup> The system can be briefly described as follows. Gas samples were drawn from the Y-piece of the patient's breathing circuit to the mass spectrometer and analyzed for inspired  $O_2$  concentration and  $CO_2$  wave form recognition. The latter analysis allowed rejection of artifacted cycles, e.g., coughing. Then, expired gas was sampled from the outlet of a mixing chamber for

the measurements of the mixed expired  $O_2$  and  $CO_2$  concentrations. Expired flow was measured by a pneumotachometer. The duration of the entire analysis sequence was about 3 min. The mean values of these parameters were calculated over 6 h.  $Pa_{CO_2}$  was measured at the end of each period.

Measurements of the ventilatory response to  $CO_2$  were achieved at the end of each dietary regimen (fig. 1). Carbon dioxide at levels of 1.5% and 3% was introduced in the gas mixture delivered to the ventilator.  $\dot{V}E$  and end-tidal  $P_{CO_2}$  ( $P_{ETCO_2}$ ) were measured as soon as steady state conditions were achieved at each level of  $F_{ICO_2}$ . It took approximately 10 min to achieve a new steady state level.

Results are presented as the mean ± SE and further statistics calculated with the use of analysis of variance with Duncan's multiple-range follow-up tests.<sup>13</sup> Correlations were calculated with the use of regression analysis.

Results

The values of the physiologic variables measured during the three standard protein periods were not statistically different (table 2), and thus were pooled for the comparison with the values measured during high-protein 24% and high-protein 41% BCAA periods.

By comparison with the standard protein period, there were no significant changes in  $\dot{V}_{O_2}$  and  $\dot{V}_{CO_2}$  during both

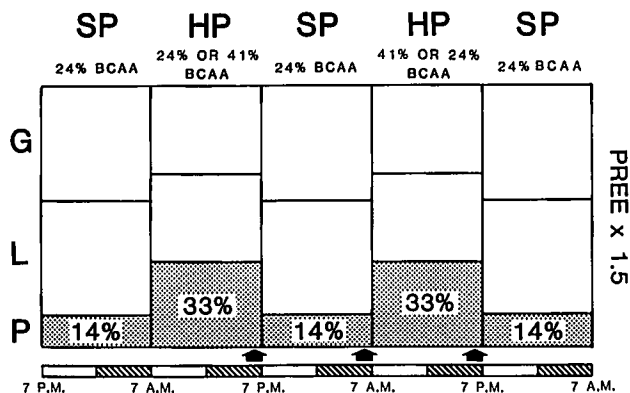

FIG. 1. General outline of the study. The total caloric intake is set at 1.5 times the predicted resting energy expenditure and provided as glucose (G), lipids (L), and proteins (P) as a 24% or 41% branched chain amino acid (BCAA) solution. During the second half of each standard protein period (SP) or high-protein period (HP),  $\dot{V}_{CO_2}$ ,  $\dot{V}_{O_2}$ , and RQ are continuously recorded with a system with the use of a mass spectrometer. The arrows indicate the time course of the  $CO_2$  tests.

TABLE 2. Metabolic and Respiratory Measurements during the Three Standard Protein (SP) Periods

|          | $\dot{V}_{CO_2}$<br>( $ml \cdot min^{-1} \cdot m^{-2}$ ) | $\dot{V}_{O_2}$<br>( $ml \cdot min^{-1} \cdot m^{-2}$ ) | RQ          | $\dot{V}E$<br>( $l \cdot min^{-1}$ ) |
|----------|----------------------------------------------------------|---------------------------------------------------------|-------------|--------------------------------------|
| SP day 1 | 124 ± 6                                                  | 141 ± 7                                                 | 0.88 ± 0.01 | 10.1 ± 0.7                           |
| SP day 2 | 127 ± 6                                                  | 146 ± 7                                                 | 0.87 ± 0.01 | 10.6 ± 0.6                           |
| SP day 3 | 125 ± 6                                                  | 143 ± 7                                                 | 0.87 ± 0.01 | 9.9 ± 0.5                            |

$\dot{V}_{CO_2}$  = carbon dioxide production;  $\dot{V}_{O_2}$  = oxygen consumption; RQ = respiratory quotient;  $\dot{V}E$  = minute ventilation.

TABLE 3. Metabolic and Respiratory Measurements during the Three Study Periods

|             | $\dot{V}_{CO_2}$<br>( $ml \cdot min^{-1} \cdot m^{-2}$ ) | $\dot{V}_{O_2}$<br>( $ml \cdot min^{-1} \cdot m^{-2}$ ) | RQ          | $\dot{V}E$<br>( $l \cdot min^{-1}$ ) | $P_{aCO_2}$<br>(mmHg) |
|-------------|----------------------------------------------------------|---------------------------------------------------------|-------------|--------------------------------------|-----------------------|
| SP          | 125 ± 6                                                  | 144 ± 7                                                 | 0.87 ± 0.01 | 10.2 ± 0.6                           | 32 ± 2                |
| HP 24% BCAA | 129 ± 6                                                  | 151 ± 7                                                 | 0.86 ± 0.01 | 10.8 ± 0.6                           | 32 ± 2                |
| HP 41% BCAA | 128 ± 6                                                  | 150 ± 7                                                 | 0.86 ± 0.02 | 10.7 ± 0.6                           | 35 ± 2                |

$\dot{V}_{CO_2}$  = carbon dioxide production;  $\dot{V}_{O_2}$  = oxygen consumption; RQ = respiratory quotient;  $\dot{V}E$  = minute ventilation;  $P_{aCO_2}$  = arterial carbon dioxide partial pressure; SP = standard protein period; HP 24%

BCAA = high protein period with a 24% branched chain amino acid solution; HP 41% BCAA = high protein period with a 41% branched chain amino acid solution.

high-protein periods. RQ,  $\dot{V}E$ , and  $P_{aCO_2}$  values were the same for the three protein regimens (table 3). Changing protein intake failed to affect the increase in  $\dot{V}E$  induced by the administration of the two levels of  $F_{ICO_2}$ , 1.5% and 3% (fig. 2).

### Discussion

The results of this study show that increasing total protein intake and/or the amount of BCAA supplied fails to affect the ventilatory response to  $CO_2$  in postoperative patients. These findings are in opposition to some previously published works, which requires further explanation.

First, in some of these studies, changes in protein intake were associated with changes in total caloric intake, and, thus, with changes in the metabolic rate resulting from the thermogenic effect of nutrients.<sup>14</sup> Increasing the metabolic rate, *per se*, enhances the ventilatory response to  $CO_2$ .<sup>15</sup> Second, in other studies,<sup>7</sup> proteins were administered without concurrent administration of carbohydrate, which may lead to ketosis, another factor that could

increase ventilatory drive.<sup>16</sup> Third, in the study conducted by Askanazi *et al.*<sup>6</sup> in depleted patients, in which the total caloric intake was kept constant at 1.35 times the measured resting energy expenditure, a leftward shift of the  $\dot{V}E/P_{aCO_2}$  relationship was observed when the protein intake was increased. Nevertheless, no change in the mean inspiratory flow, a commonly used index of central inspiratory drive, occurred.<sup>17</sup>

In our study, particular attention was paid to minimize changes of the metabolic rate and the  $CO_2$  load induced by the modifications of the protein intake. Thus, the total caloric intake was kept constant at 1.5 times the predicted resting energy expenditure, and  $\dot{V}_{O_2}$  and  $\dot{V}_{CO_2}$  values were the same for the three protein regimens. For the same reasons, patients received inspiratory pressure support throughout the study. In postoperative patients, this mode of ventilation takes over the major part of the work of breathing.<sup>18</sup>

In our study, some factors may have interfered with eventual changes in the ventilatory sensitivity to  $CO_2$ . First, inspiratory pressure support induces a reduction in the ventilatory drive,<sup>19</sup> which could explain the low values of the slopes of the  $\dot{V}E/P_{aCO_2}$  relationship found in our patients. However, the same mode of ventilation and thus of respiratory mechanical unloading was used during the administration of the three protein regimens and could not have cancelled an increase in the ventilatory drive. Second, a depressive effect of the anesthetic drugs used during the surgical procedure on the  $CO_2$  response could be ruled out because the ventilatory variables (respiratory rate, minute volume) were the same during the three standard protein periods. Third, a recent investigation<sup>20</sup> suggested that the slope of the  $CO_2$  response curve was not linear and was reduced at low levels of  $P_{aCO_2}$ . This factor might have contributed to lower the slope of the  $\dot{V}E/P_{aCO_2}$  relationship in our patients but could not have suppressed a difference in the ventilatory response to  $CO_2$  associated with changes in the protein intake because the initial  $P_{aCO_2}$  was the same from one regimen to the other.

In conclusion, the present study demonstrated that in postoperative patients undergoing inspiratory pressure support ventilation, changing the quality or the amount

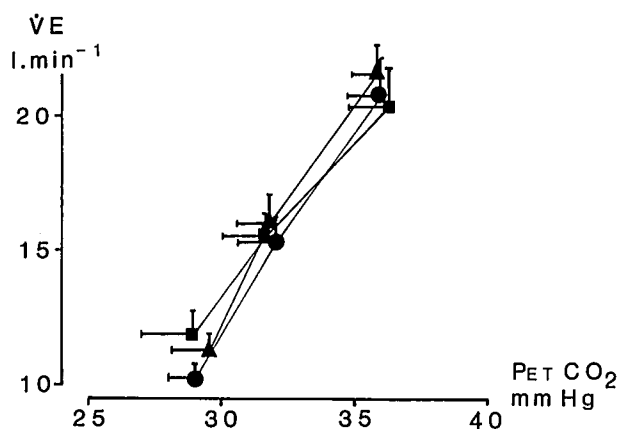

FIG. 2. Relationship between minute expired volume ( $\dot{V}E$ ) and end-tidal partial pressure of  $CO_2$  ( $P_{ETCO_2}$ ) during three levels of  $CO_2$  inhalation ( $F_{ICO_2}$ : 0, 1.5, and 3%). Circles: standard protein period (the mean slope  $\pm$  SE for the eight patients was  $1.49 \pm 0.25$ ). Squares: 24% BCAA high-protein period (mean slope  $\pm$  SE:  $1.18 \pm 0.26$ ). Triangles: 41% BCAA high-protein period (mean slope  $\pm$  SE:  $1.84 \pm 0.40$ ). There were no statistically significant differences among the three slopes.

of protein component of a fixed caloric intake failed to affect the pulmonary gas exchange and the ventilatory response to CO<sub>2</sub>. From a practical point of view, we conclude that in these patients the potential nutritional advantages of a high protein intake are not cancelled by a deleterious effect on the ventilatory function.

The authors thank Dr. Gérard Perenchio for his valuable suggestions on the design of this study, Mireille Volland for secretarial assistance, and Didier Maupas for technical assistance.

### References

1. Shaw SN, Elwyn DH, Askanazi J, Iles M, Schwarz Y, Kinney JM: Effects of increasing nitrogen intake on nitrogen balance and energy expenditure in nutritionally depleted adult patients receiving parenteral nutrition. *Am J Clin Nutr* 37:930-940, 1983
2. Sheldon GF, Petersen SR, Sanders R: Hepatic dysfunction during hyperalimentation. *Arch Surg* 113:504-508, 1978
3. Weinsier RL, Bacon J, Butterworth CE: Central venous alimentation: A prospective study of the frequency of metabolic abnormalities among medical and surgical patients. *JPEN* 6:421-425, 1982
4. Askanazi J, Rosenbaum SH, Hyman AI, Silverberg PA, Milic-Emili J, Kinney JM: Respiratory changes induced by the large glucose loads of total parenteral nutrition. *JAMA* 243:1444-1447, 1980
5. Cerra FB, Mazudki JE, Chute E, Nuner N, Teasley K, Lysne J, Shronts EP, Konstantinides FN: Branched chain metabolic support; a prospective, randomized, double-blind trial in surgical stress. *Ann Surg* 199:286-291, 1984
6. Askanazi J, Weissman C, LaSala PA, Milic-Emili J, Kinney JM: Effect of protein intake on ventilatory drive. *ANESTHESIOLOGY* 60:106-110, 1984
7. Weissman C, Askanazi J, Rosenbaum S, Hyman AI, Milic-Emili J, Kinney JM: Amino acids and respiration. *Ann Intern Med* 98:41-44, 1983
8. Takala J, Askanazi J, Weissman C, LaSala PA, Milic-Emili J, Elwyn DH, Kinney JM: Changes in respiratory control induced by amino acid infusions. *Crit Care Med* 16:465-469, 1988
9. Simonneau G, Vivien A, Sartene R, Kunstlinger F, Samii K, Noviant Y, Duroux P: Diaphragm dysfunction induced by upper abdominal surgery. *Am Rev Respir Dis* 128:899-903, 1983
10. Roza AM, Shizgal HM: The Harris Benedict equation reevaluated: Resting energy requirements and the body cell mass. *Am J Clin Nutr* 40:168-182, 1984
11. Metropolitan Life Insurance Company, Health and Safety Education Division: Metropolitan height and weight tables. *Stat Bull Metrop Insur Co* 64:2-9, 1983
12. Bertrand O, Viale JP, Annat G, Sebes F, Delafosse B, Percival C, Bui-Xuan B, Motin J: Mass spectrometer system for long term continuous measurements of  $\dot{V}O_2$  and  $\dot{V}CO_2$  during artificial ventilation. *Med Biol Eng Comput* 24:174-181, 1986
13. Winer BJ: *Statistical Principles in Experimental Design*. New York, McGraw-Hill, 1971, pp 196-202
14. Pittet P, Gygax P, Jequier E: Thermic effect of glucose and amino acids in man studied by direct and indirect calorimetry. *Br J Nutr* 31:343-349, 1974
15. Zwillich CW, Sahn SA, Weil JV: Effects of hypermetabolism on ventilation and chemosensitivity. *J Clin Invest* 60:900-906, 1977
16. Fried PI, McClean PA, Phillipson EA, Zamel N, Murray FT, Marliss EB: Effects of ketosis on respiratory sensitivity to carbon dioxide in obesity. *N Engl J Med* 294:1081-1086, 1976
17. Milic-Emili J, Grunstein MM: Drive and timing components of ventilation. *Chest* 70:131-133, 1976
18. Viale JP, Annat GJ, Bouffard YM, Delafosse BX, Bertrand OM, Motin JP: Oxygen cost of breathing in postoperative patients. Pressure support ventilation vs continuous positive airway pressure. *Chest* 93:506-509, 1988
19. Poon Chi-Sang, Ward SA, Whipp BJ: Influence of inspiratory assistance on ventilatory control during moderate exercise. *J Appl Physiol* G2(2):551-560, 1987
20. Jacobi MS, Iyawe VI, Patil CP, Cummin ARC, Saunders KB: Ventilatory responses to inhaled carbon dioxide at rest and during exercise in man. *Clin Sci* 73:177-182, 1987
